# Supplementary material for: C–H functionalisation tolerant to polar groups could transform fragment-based drug discovery (FBDD)
Source: Chem Sci. 2021 Sep 1;12(36):11976–85. doi: 10.1039/d1sc03563k (PMC8457390; doi:10.1039/d1sc03563k)
Supplement: SC-012-D1SC03563K-s002 [file SC-012-D1SC03563K-s002.xlsx]

## Sheet: Analysis
	Total entries			131						191														230													230
										8	0	43	25	16	7	18	41	14	9	2	1	7		149	13	0	10	18	10	4	7	4	1	0	11	3	70	39	7	3	4	32	26	17	19	2	7	4
	Year	Entry	Fragment Hit + PDB Code (where available)	Lead + PDB Code (where available)	Institution	Target	Binding pose changed?	Scaffold Hop?	Fragment functionalities interacting with proteins														Nominal growing vectors														Bond formation
									# fragment / protein interactions	Arom CH	Aliph CH	Arom N	Arom NH	Aniline NH	Aliph NH	Amide NH	CO	Acid COOH	Arom OH	Aliph OH	Arom Hal	Other polar funct.	# nominal growing vectors	Arom CH	Aliph CH	Arom N	Arom NH	Aniline NH	Aliph NH	Amide NH	CO	Acid COOH	Arom OH	Aliph OH	Arom Hal	Other polar funct.	C(sp2)-C(sp2)	C(sp2)-C(sp3)	C(sp3)-C(sp3)	C(sp2)-C(alkyne)	C(sp2)-C(nitrile)	Csp2-N	Csp3-N	amide	Csp2-O	Csp3-O	C-Hal	sulfonamide
	2015	1	4ZLY	4Z3V	Takeda	BTK	N	N	3					1		1	1						1	1													1
	2015	2	5BVK	5BVN	Astex	DDR1/2	N	N	2							1	1						3	3														1				1					1
	2015	3	4QP1	4QPA	Genentech	ERK2	Y	N	2			1	1										2	2													2
	2015	4	4UMR	4D2V	Astex, Janssen	MELK	N	N	1								1						2	2													1								1
	2015	5		4UMT*	Astex, Janssen	MELK	N	N	2	1		1											2	2																1		1
	2015	6	4UNP	4UNS	AZ	Mtb TMK	N	N	2				1				1						2	2													1				1
	2015	7	5DHJ	5DIA*	Genentech	Pim 2K	N	N	2			1	1										1	1													1
	2015	8	4Q9S	4Q9Z	Abbvie	PKC-theta	N	N	2			1				1							3	2	1													1	1			1
	2015	9			Naple, Arizona & Synactix	RET, VEGFR2	N	N	2	1		1											2	1											1		1	1
	2015	10	4ZSM	4ZSP	Lilly	BACE1	N	N	1													1	1		1																		1
	2015	11	4X8T	4X8V*	BMS	Factor Vlla	N	N	2							1	1						1												1							1
	2015	12	4CR5	4CRF	AZ	FXIa	N	N	1				1										1	1														1
	2015	13			Zurich	MMP-13	N	N	2							1	1						2	1						1										1			1
	2015	14	5BWR*	5BWX*	GSK, Strathclyde	BCATm	N	N															2	2														1				1
	2015	15	5BOD*		A*STAR	DNA gyrase B	N	N	3			1	1	1									3	2				1										2						1
	2015	16	4UCR	4UCO	AZ	LigA	N	N	3			1				1	1						3	3													1	1				1
	2015	17			Indiana	mPTPB	N	N	1													1	1								1													1
	2015	18	5C1W	5C2H	Merck	Phopshodiesterase 10A	N	N	1			1											2	1											1							1			1
	2015	19	4Y2J	4Y2X	Astellas	Soluble epoxide hydrolase	N	N	1						1								2						2														2
	2015	20	5C5R	5C5Q*	Roche	Tankyrase	N	N	2				1				1						3	2	1												2		1
	2015	21			Indiana, Texas, UCSD	UBLCP1	N	N	2									1	1				2	2																1					1
	2015	22	5A5O	5A83*	GSK	ATAD2	N	N	2				1				1						2	2													1					1
	2015	23		4ZBI	Vanderbilt	Mcl-1	N	N	1									1					2	2														1									1
	2015	24	4B2L		Cambridge	RAD51		N	1				1										1						1																			1
	2015	25	4LUO*	4LWC	Vanderbilt	RPA70N	Y	N															1	1														1
	2015	26	5C3H	5C84*	Astex	XIAP & cIAP	N	N	2						1		1						3		2						1								2					1
	2015	27		5CGD	Heptares	mGluR5	N	N	1			1											2	2													2
	2016	1			National Tsung Hua	Aurora A/B	N	N	2			1	1										2	1				1														1		1
	2016	2	5EQE	5EQY	ARIAD	Choline Kinase α	N	N	1						1								2	2													1				1
	2016	3	5CLP & 5CSV	5CU3	Cambridge	CK2α	N	N	2						1			1					3					1	1						1		1						1	1
	2016	4	5L3A		LEO Pharma	JAK1, JAK2, JAK3		N	2			1	1										2	1												1	1											1
	2016	5			Takeda	MKK3/6	N	N	2							1	1						1	1													1
	2016	6		5I3Y	Amgen	BACE1	N	N	1							1							1												1			1
	2016	7		5JI6*	Takeda	MetAP2	N	N	2			1	1										1	1													1
	2016	8		4Z22*	Latvian institute of Org Syn and Crick	Plasmepsin II	N	N	2			1		1									2	1	1												1	1
	2016	9	5SY3	5KOQ	Takeda	Renin	Y	N	1						1								2	2													1	1
	2016	10	5I5V	5I5X	GSK, Strathclyde	BCATm	N	N	1								1						1									1												1
	2016	11	5I5W	5I60*	GSK, Strathclyde	BCATm	N	N															3	2						1							1	1					1
	2016	12	5K03*	5K0L	Roche	Catechol O-methyltransferase	N	N	2			1	1										1	1														1
	2016	13	3R59	4J5C*	Univ Paris Est, Univ Montpellier	Cyclophillin D	N	N	1					1									1	1														1
	2016	14	4G47	5IBE	Cambridge, Manchester, Sao Paolo, Crick	CYP121	Y	N															1	1													1
	2016	15	5DTM	5DTR*	Novartis	DOT1L	N	Y															2					2														1	1
	2016	16			Univ Calornia, San Diego	Endonuclease	N	N	2								1		1				2	1			1											1				1
	2016	17			AZ	FabH	N	N	1									1
	2016	18		5CTY	Cubist, Evotec	GyrB	N	N	3			1	2										1	1													1
	2016	19		5A7W	Univ Oxford, Univ California (San Fran)	KDM4C	N	N	2									1	1				2	1						1							1							1
	2016	20	5JAH	5LZ9	Astex, GSK	Lp-PLA2	N	N	1								1						2		1					1									1				1
	2016	21	5JAO	5JAU	Astex, GSK	Lp-PLA2	N	N															2	1				1														1			1
	2016	22	5F3T	5HMZ*	NovartIs, Univ Texas	RdRp	N	N	1									1					3	2								1					1							1	1
	2016	23	5G3M	5G3N*	AZ	sPLA2	N	N	2							1	1						1	1													1
	2016	24	5F25*	5F1H	Boehringer Ingelheim	BRD9	N	N	1								1						4	4													2								2
	2016	25	4YK0	5I8G	Constellation, Genentech	CBP/EP300	N	N	2							1	1						1	1													1
	2016	26	5FNQ	5FNU	Astex, GSK	KEAP1	N	N	1									1					2	1	1													2
	2016	27	4Y03	5DKH	Pfizer	PB1(5)	N	N	2									1	1				1									1					1
	2016	28	5F1J & 5F27	5EYR	Univ Cambridge, Institut Pasteur de Lille	EthR	N	N	1								1						1								1													1
	2017	1			KAIST, Inha Univ, Univ Ulsan	ALK (L1196M)	N	N	1			1											1	1													1
	2017	2		5ISO*	Merck, Metabasis	AMPK		N	1				1										2	1											1		1								1
	2017	3	5XQX*	5XS2*	Roche Innovation Centre Shanghai	CDK8	Y	N	2	1							1						1	1														1
	2017	4	5UIQ	5UIU	Pfizer	IRAK4	N	N	2							1	1						2	2													2
	2017	5	5WBO	5WBZ	Pfizer	Ketohexokinase	Y	N															1	1																		1
	2017	6			Brigham Young Univ, Tolero Pharmaceuticals, Univ Utah	PDK1	N	N	2			1	1										2	2													1					1
	2017	7		5M4P*	Vernalis	Pyruvate Dehydrogenase Kinase	N	N	2										2				1								1													1
	2017	8	5FBI*	5NB7	Novartis	Complement factor D	N	Y	2							1	1
	2017	9	5WHC		Genentech	USP7		Y	1										1
	2017	10	5VBO	5V8N*	Pfizer, Univ Mass, Univ Hospitals Bonn	cGAS	N	N															1	1													1
	2017	11	5MW3	5MW4	Novartis	DOT1L	N	N	2			1	1										2						2														2
	2017	12		5MMO*	Actelion Pharmaceuticals	GyrB/ParE	N	N	2							2							2	2													1	1
	2017	13		5VMP	Celgene, European Institute of Oncology, Chicago Univ	KDM4		N	2			1						1					1					1															1
	2017	14	5YE8	5YEA*	Chinese Academy of Science, ShanghaiTech	Lp-PLA2	N	N	1													1	2					1							1										1			1
	2017	15		5NGS	Stockholm Univ, Karolinska Instituet, Uppsala Univ	MTH1		Y	4			2	1	1									1													1										1
	2017	16		5NGT*	Stockholm Univ, Karolinska Instituet, Uppsala Univ	MTH1	N	N	2			1		1									1	1													1
	2017	17	6B98	6B96	Merck	PDE2	Y	N															1					1															1
	2017	18		5T2Y	MIT, Univ Dundee	PgID acetyltransferase	N	N	2			1						1					2	2														1				1
	2017	19	5X1V	5X1W	Daiichi Sankyo	PKM2	N	N	1								1						1						1														1
	2017	20	4A9H	5VOM*	Forma	BRD4	N	N	1								1						2	1				1									1							1
	2017	21	5UEP	5UER	Abbvie	BRD4	Y	N	1								1						1	1													1
	2017	22	5UF0	5UEX	Abbvie	BRD4	N	N	1								1						2	2																					2
	2017	23	5T4U	5T4V*	UCL, SGC< Pfizer, CRUK, AZ etc	BRPF	N	N	1								1						2	2														1				1
	2017	24	6AXQ	6AY3	Genentech, Wuxi, Editas Medicine	CBP/P300	N	N	1								1						2	1							1											1		1
	2017	25	5MKX*	5MLJ	GSK, Cellzome, Univ Strathclyde	PCAF/GCN5	N	N	2					1			1						1					1															1
	2017	26	5X4M	5X4Q	Takeda	BCL6	N	N	1					1									4	3				1										1				1	1				1
	2017	27	5N1X	5N1Z	AZ. Pharmaron	BCL6	Y	N	1					1									3	2				1													1	2
	2017	28			Dalian University of technology	Mcl-1	N	N	1									1					1				1																					1
	2017	29	5U5K	5U62*	Novartis	PRC2/EED	N	N															3	1	1				1									1				1			1
	2017	30	5H24		Novartis	PRC2/EED	N	N	3	1		1		1									1	1													1
	2018	1		6GIN	ICR, Univ Barcelona	ALK2	N	N	2	1		1											2	1			1										1					1
	2018	2		6GIP	ICR, Univ Barcelona	ALK2	Y	N	2				1				1						3	3													1	2
	2018	3	3MS9	5MO4	Novartis	BCR-ABL1	N	Y	1												1
	2018	4	6DI0	6DI1*	EMD Serono	BTK	N	N	2							1	1						2	2																		2
	2018	5			Technische Univ Braunschweig, RWTH Aachen, ManRos Therapeutics	DYRK1A	N	N	1													1	1	1													1
	2018	6	6G92	6G9N	Astex	ERK1/2	N	N	2			1		1									2	1				1									1						1
	2018	7	6CJE*	6CK6	eFFector Therapeutics et al	MNK1/2	N	N	1			1											2	1				1														2
	2018	8			A*Star et al	MNK1/2	N	N	2	1		1											1	1													1
	2018	9			A*STAR	PKC iota	N	N	2			1	1										1												1		1
	2018	10		5N9R*	Almac, Queen's Univ Belfast	USP7		N	3	1		1					1						3	1			2										1						2
	2018	11	5O4V	5MU6	Imperial	Human N-myristoyltransferase	N	N	1						1								3	2			1																1		1		1
	2018	12	5OU2	5OU3	Univ Cambridge, Univ Cape Town, Univ Melbourne	IMPDH	N	N	1				1										2	1											1							1			1
	2018	13	6F20	6F1X*	Sprint Bioscience et al	MTH1	N	N	2			1	1										2	2													1					1
	2018	14			Abbvie	NAMPT	N	N															1								1													1
	2018	15	5XUJ	5XUI*	Astellas	PDE10A	N	N	1			1											4	4													2	1							1
	2018	16	6CCM*	6CCK	Novartis	PPAT	N	N	2			1		1									2	1	1														1								1
	2018	17	4A9H	6FFG	GSK, Strathclyde	BET family BD2	N	N	1								1						3	1	1			1									1		1				1
	2018	18		6CKS	Celgene Quanticel Research, Univ Chicago	BRD4-BD1	N	N	1								1						2	2													2
	2018	19	4TQN*	5NLK	Univ Zurich	CBP	Y	N	1								1						1					1																1
	2018	20	5XXH*		Chinese Academy of Sciences	CBP/EP300	N	N	2								1	1					2	2													1								1
	2018	21	5OCO*	6FA4	Univ Oxford, Univ Leeds et al	HRAS	N	Y															1	1													1
	2018	22	6D9X	6DAS*	Vanderbilt	WDR5	N	N	1			1											2	2														2
	2018	23			Vrije Univ et al	β2AR		N	1						1								1						1														1
	2018	24	4N07	6FAZ	Univ Copenhagen et al	AMPA receptor	N	N	1													1	1	1														1
	2018	25	6FZU	6G07	Novartis	RORyT	N	N	2							1	1						2					1					1											1		1
	2018	26			GSK, Cellzome	Unknown		N															1	1														1
	2019	1		6ILZ	A*STAR	PKC-i	N	N	2			1		1									1	1													1
	2019	2	6SZE	6UL8	GSK	RIP2	Y	N	2					1			1						2	1			1															1	1
	2019	3		6SKB*	GSK, INSERM	Kallikrein 5 (KLK5)	N	N	1													1	2	2														1							1
	2019	4	2D0T	6O3I	NewLink Genetics, Genentech	IDO1	N	N	1			1											3	2			1											1					1				1
	2019	5	4MK1	6NEL	State Univ New Jersey, Univ Rochester Medical Center	Influenza A endonuclease	N	N	3				1				1		1				2	1											1		2
	2019	6	2XFP		Hefei Univ Technology	hMAO-B		N	2							1	1						1	1																					1
	2019	7	6EQ5	6EQ7	Univ Zurich, Univ Applied Sciences and Arts Northwestern Switzerland	MTH1	Y	N	2			1		1									1	1													1
	2019	8	6R8P	6R8Q*	Univ College, London; Univ Oxford; The Francis Crick Institute	Notum	N	N															2	2													1					1
	2019	9	6G25	6G2O	Boehringer Ingelheim, Univ Toronto, Univ Oxford, Univ North Carolina, Cold Spring Harbor	NSD3-PWWP1	N	N	2	1		1											4	3			1										3					1
	2019	10	6E6V	6E6W*	UCSD, Nankai Univ	PAN Endonuclease (Influenza virus)	N	N	3								1	1	1				1	1													1
	2019	11	6RIH	6RJ6	Boehringer Ingelheim, Shanghai ChemPartner	PHGDH	N	N	1							1							1								1													1
	2019	12	6QOT & 6QOU	6QR6	Univ Cambridge, Royal Papworth Hospital, National Institutes of Health	Mab TrmD	N	N	2			1	1										3	3													1				1	1
	2019	13	6R9S & 6RA1	6R8W*	Merck KGaA, EMD Serono, Edelris, Proteros Biostructures	Cyclophilin D	N	N	2								1			1			2									1			1			1						1
	2019	14	4EPV	6GJ7*	Boehringer Ingelheim, Vanderbilt Univ	K-RasG12D	N	N	1				1										2	2														2
	2019	15			Rice Univ	Lyn SH3	N	N	2			1		1									1						1														1
	2019	16		6QYO	Servier, Vernalis	Mcl-1	N	N	1									1					2	1	1												1	1
	2019	17	5YAV	5YAW*	Shanghai Institute of Materia Medica	PDEδ	N	N	2			2											3	2												1	1						1		1
	2019	18	600Y	6OP0	UCB, Covance, Broad Institute	TNF	N	N	2			1								1			2	1	1												1	1
	2019	19			Gedeon Richter Plc., Hungarian Academy of Sciences, Mitsubishi Tanabe	mGluR2		N															2	1			1																1				1
	2019	20	6NCN	6NCO*	AbbVie	Apolipoprotein E4	N	N	1													1	1	1													1
