# Supplementary material for: C–H functionalisation tolerant to polar groups could transform fragment-based drug discovery (FBDD)
Source: Chem Sci. 2021 Sep 1;12(36):11976–85. doi: 10.1039/d1sc03563k (PMC8457390; doi:10.1039/d1sc03563k)
Supplement: SC-012-D1SC03563K-s003 [file SC-012-D1SC03563K-s003.csv]

Year	Entry	DOI	Fragment PDB Code (where available)	Fragment SMILES	Additional Fragment PDB Code	Additional Fragment SMILES	Lead PDB Code (where available)	Lead SMILES	Institution	Target	Binding pose changed?	Scaffold Hop?	# fragment / protein interactions	INT: Arom CH	INT: Aliph CH	INT: Arom N	INT: Arom NH	INT: Aniline NH	INT: Aliph NH	INT: Amide NH	INT: CO	INT: Acid COOH	INT: Arom OH	INT: Aliph OH	INT: Arom Hal	INT: Other polar funct.	# nominal growing vectors	GV: Arom CH	GV: Aliph CH	GV: Arom N	GV: Arom NH	GV: Aniline NH	GV: Aliph NH	GV: Amide NH	GV: CO	GV: Acid COOH	GV: Arom OH	GV: Aliph OH	GV: Arom Hal	GV: Other polar funct.	BF: C(sp2)-C(sp2)	BF: C(sp2)-C(sp3)	BF: C(sp3)-C(sp3)	BF: C(sp2)-C(alkyne)	BF: C(sp2)-C(nitrile)	BF: Csp2-N	BF: Csp3-N	BF: amide	BF: Csp2-O
2015	1	10.1021/acs.jmedchem.5b00734	4ZLY	NC(=O)c1nnc2ccccc2c1N			4Z3V	Cc1cc2cn[nH]c2cc1c3cccc4c(N)c(nnc34)C(=O)N	Takeda	BTK	N	N	3					1		1	1						1	1													1
2015	2	10.1021/acsmedchemlett.5b00143	5BVK	Clc1ccccc1NC(=O)NCc2cccnc2			5BVN	Cc1ccc(CNC(=O)Nc2cccc(F)c2)cc1NC(=O)c3cnc4ccccn34	Astex	DDR1/2	N	N	2							1	1						3	3														1				1
2015	3	10.1016/j.bmcl.2015.08.048	4QP1	C(Nc1ncnc2[nH]cnc12)c3ccccc3			4QPA	C(c1ccccc1)n2cc(cn2)c3c[nH]c4ncc(nc34)c5ccncc5	Genentech	ERK2	Y	N	2			1	1										2	2													2
2015	4	10.1021/ml5001245	4UMR	Fc1ccc(cc1)C(=O)Nc2ccc3CCNCc3c2			4D2V	COc1cc(ccc1C(=O)Nc2ccc3CCNCCc3c2)c4cn[nH]c4	Astex, Janssen	MELK	N	N	1								1						2	2													1								1
2015	5	10.1021/ml5001273		c1ccc2cnccc2c1			4UMT*	CNc1cc2ccc(C#CCOc3ccc(CN4CCNCC4)c(c3)C(F)(F)F)cc2cn1	Astex, Janssen	MELK	N	N	2	1		1											2	2																1		1
2015	6	10.1021/jm5012947	4UNP	CCCc1cc2[nH]c(=O)ccc2c(C)n1			4UNS	CCc1cc2[nH]c(=O)c(C#N)c(c3ccc(NS(=O)(=O)C)cc3)c2c(C)n1	AZ	Mtb TMK	N	N	2				1				1						2	2													1				1
2015	7	10.1016/j.bmcl.2015.09.052	5DHJ	c1n[nH]c2cnc(cc12)c3cccnc3			5DIA*	CCn1cc(cn1)c2cc3c(n[nH]c3cn2)c4cccc(n4)N5CCNCC5	Genentech	Pim 2K	N	N	2			1	1										1	1													1
2015	8	10.1021/jm500669m	4Q9S	O=C1CN2C(=NN1)COc3ccccc23			4Q9Z	C[C@H]1N2C(=NNC1=O)COc3cc(c(NC4(C)CNC4)cc23)C(F)(F)F	Abbvie	PKC-theta	N	N	2			1				1							3	2	1													1	1			1
2015	9	10.1002/anie.201501104		Brc1ccc2n(cnc2c1)c3ccccc3				Cn1cc(cn1)c2ccc3n(cnc3c2)c4ccc(CC(=O)Nc5cc(on5)C(C)(C)C)cc4	Naple, Arizona & Synactix	RET, VEGFR2	N	N	2	1		1											2	1											1		1	1
2015	10	10.1016/j.bmc.2015.04.062	4ZSM	NC1=NC2CCCCC2CS1			4ZSP	NC1=NC2CCC(CC2CS1)NC(=O)c3cccc(Cl)c3	Lilly	BACE1	N	N	1													1	1		1																		1
2015	11	10.1021/jm501982k	4X8T	Clc1ccc2CCNC(=O)c2c1			4X8V*	COC(=O)Nc1ccc(c(c1)[C@H]2CCCN2C(=O)[C@H](Nc3ccc4CCNC(=O)c4c3)c5cc(OC)c(OC)cc5F)S(=O)(=O)C(C)C	BMS	Factor Vlla	N	N	2							1	1						1												1							1
2015	12	10.1371/journal.pone.0113705	4CR5	Clc1ccc2[nH]c(=O)ccc2c1			4CRF	Oc1cc(=O)[nH]c2ccc(cc12)C(=O)N[C@@H](Cc3ccccc3)C(=O)NCc4cc(=O)[nH]c5ccc(Cl)cc45	AZ	FXIa	N	N	1				1										1	1														1
2015	13	10.1002/cmdc.201402478		O=c1cc[nH]c(=O)[nH]1				COc1cccc(CNC(=O)C#Cc2cn(Cc3ccc(cc3)C(=O)O)c(=O)[nH]c2=O)c1	Zurich	MMP-13	N	N	2							1	1						2	1						1										1			1
2015	14	10.1021/acs.jmedchem.5b00313	5BWR*	CCOc1nn2c(=O)cc(C)[nH]c2c1C#N			5BWX*	CCCc1cc(=O)n2nc(NCc3c(F)cc(Cl)cc3F)c(C#N)c2[nH]1	GSK, Strathclyde	BCATm	N	N															2	2														1				1
2015	15	10.1002/cplu.201500197	5BOD*	Nc1cc(n[nH]1)c2ccc(Cl)cc2				Cc1cc(cc(c1)C(F)(F)F)c2cc(NC(=O)c3ccc(cc3C)C(=O)O)[nH]n2	A*STAR	DNA gyrase B	N	N	3			1	1	1									3	2				1										2						1
2015	16	10.1016/j.tetlet.2014.12.067	4UCR	Cc1ccc2cc(cc(O)c2n1)C(=O)N			4UCO	CC(C)(C)c1nc(c2ccc[nH]2)c3cc(C(=O)N)c(N)nc3n1	AZ	LigA	N	N	3			1				1	1						3	3													1	1				1
2015	17	10.1021/acsmedchemlett.5b00373		NC(=O)C(c1ccccc1)S(=O)(=O)O				OS(=O)(=O)C(C(=O)N1CCCC2CCCCC21)c3ccccc3	Indiana	mPTPB	N	N	1													1	1								1													1
2015	18	10.1021/acs.jmedchem.5b00983	5C1W	Cc1c(Cl)nc(nc1Cl)C2CC2			5C2H	Cc1nc(C)c(CNc2nc(OCCCc3ccc4ccccc4n3)nc(Cl)c2C)s1	Merck	Phopshodiesterase 10A	N	N	1			1											2	1											1							1			1
2015	19	10.1016/j.bmc.2015.03.083	4Y2J	Cn1ccc(CNCCc2ccccc2)n1			4Y2X	Oc1ccccc1CNCCC2(CC3CC4CC(C3)C2)C4	Astellas	Soluble epoxide hydrolase	N	N	1						1								2						2														2
2015	20	10.1021/acsmedchemlett.5b00251	5C5R	CC(C)C1Cc2[nH]c(=O)c(C#N)cc2CO1			5C5Q*	Cc1cccc2c(=O)[nH]c3CC(OCc3c12)C(C)(C)CO	Roche	Tankyrase	N	N	2				1				1						3	2	1												2		1
2015	21	10.1016/j.bmc.2015.03.066		OC(=O)c1ccccc1O				CCCCC(Oc1cc(O)c(cc1C#Cc2ccccc2OC(F)(F)F)C(=O)O)C(=O)NC3CCCCC3	Indiana, Texas, UCSD	UBLCP1	N	N	2									1	1				2	2																1					1
2015	22	10.1021/acs.jmedchem.5b00773	5A5O	Cc1cc2ccccc2[nH]c1=O			5A83*	Cc1cncc(c1)c2cnc(N[C@@H]3CCNC[C@H]3OCC4CCS(=O)(=O)CC4)c5[nH]c(=O)c(C)cc25	GSK	ATAD2	N	N	2				1				1						2	2													1					1
2015	23	10.1021/jm501984f		CC1Cn2c(cc3cccc(S1)c23)C(=O)O			4ZBI	Cc1cc(OCCCc2c(C(=O)O)n3CCCc4c(Cl)ccc2c43)cc(C)c1Cl	Vanderbilt	Mcl-1	N	N	1									1					2	2														1
2015	24	10.1002/cmdc.201402428	4B2L	COC(=O)[C@@H](N)Cc1c[nH]c2ccccc12				Clc1sc(cc1Br)S(=O)(=O)NCCc2c[nH]c3ccccc23	Cambridge	RAD51		N	1				1										1						1
2015	25	10.1021/ml5003629	4LUO*	OC(=O)c1cc(c2ccccc2)n(n1)c3ccccc3			4LWC	OC(=O)c1ccc(o1)c2ccc(Cl)c(c2)C(=S)NCc3ccc(cc3)c4ccnn4c5ccc(Cl)c(Cl)c5	Vanderbilt	RPA70N	Y	N															1	1														1
2015	26	10.1021/acs.jmedchem.5b00706	5C3H	O=C(CN1CCNCC1)N2CCCCC2			5C84*	COC[C@H]1CN[C@H](C)CN1CC(=O)N2CC(C)(C)c3cnc(Cc4ccccc4)cc23	Astex	XIAP & cIAP	N	N	2						1		1						3		2						1								2					1
2015	27	10.1021/acs.jmedchem.5b00892		C1COc2cc(ccc2O1)c3cc(ncn3)n4cccn4			5CGD	Fc1ccc(nc1)c2cc(ncn2)c3cc(Cl)cc(C#N)c3	Heptares	mGluR5	N	N	1			1											2	2													2
2016	1	10.1016/j.ejmech.2016.08.026		Nc1cccc(c1)c2n[nH]c3ccccc23				OC(=O)/C=C\C(=O)Nc1cccc(c1)c2n[nH]c3ccc(NS(=O)(=O)c4ccccc4)cc23	National Tsung Hua	Aurora A/B	N	N	2			1	1										2	1				1														1		1
2016	2	10.1021/acs.jmedchem.5b01552	5EQE	CN1CCCN(Cc2ccc(CN)cc2)CC1			5EQY	CN1CCCN(Cc2ccc(cc2)c3ccc(CN4CCCN(C)CC4)cc3C#N)CC1	ARIAD	Choline Kinase ?	N	N	1						1								2	2													1				1
2016	3	10.1039/c6sc02335e	5CLP	NCCc1ccc(Cl)c(Cl)c1	5CSV	c1cc(cc(c1)N)C(=O)O	5CU3	OC(=O)c1cccc(NC(=O)CCNC(=O)CCNCc2ccc(c(Cl)c2)c3ccccc3)c1	Cambridge	CK2?	N	N	2						1			1					3					1	1						1		1						1	1
2016	4	10.1021/acsmedchemlett.6b00087	5L3A	CS(=O)(=O)Nc1cccc2[nH]ncc12				CCc1cc(O)c(F)cc1c2cc(NS(=O)(=O)N(C)C)c3cn[nH]c3c2	LEO Pharma	JAK1, JAK2, JAK3		N	2			1	1										2	1												1	1
2016	5	10.1016/j.bmcl.2015.11.054		NC(=O)c1nnc2ccccc2c1N				NC(=O)c1nc(c2ccns2)c3ccccn13	Takeda	MKK3/6	N	N	2							1	1						1	1													1
2016	6	10.1021/acs.jmedchem.5b01917		Fc1ccc(cc1)C(=O)Nc2ccc(Cl)nc2			5I3Y	CC(C)(C)CCNC(=O)CCc1cc2cc(ccc2nc1N)c3ccccc3CCc4ccc(NC(=O)c5ccc(F)cc5)cn4	Amgen	BACE1	N	N	1							1							1												1			1
2016	7	10.1016/j.bmcl.2016.04.073		Oc1n[nH]c2cc(Br)ccc12			5JI6*	Cc1nc(ncc1c2cc(cc3[nH]ncc23)C(F)(F)F)N4CC[C@@H](O)C4	Takeda	MetAP2	N	N	2			1	1										1	1													1
2016	8	10.1021/acs.jmedchem.5b01558		Nc1nc2ccccc2c(=O)n1CC3CCCO3			4Z22*	CCCCCc1ccc(cc1)c2ccc3c(=O)n(C[C@@H]4CC[C@@H](O4)c5ccccc5)c(N)nc3c2	Latvian institute of Org Syn and Crick	Plasmepsin II	N	N	2			1		1									2	1	1												1	1
2016	9	10.1016/j.bmc.2016.09.030	5SY3	C(Nc1ncnc2sc3CCCCc3c12)c4ccco4			5KOQ	CC(C)CN([C@H]1CCCNC1)C(=O)c2cnc(nc2NCc3ccco3)C(C)(C)C	Takeda	Renin	Y	N	1						1								2	2													1	1
2016	10	10.1021/acs.jmedchem.5b01607	5I5V	Cc1c(sc2ncn(C)c(=O)c12)C(=O)O			5I5X	Cc1c(sc2nc[nH]c(=O)c12)C(=O)Nc3nncs3	GSK, Strathclyde	BCATm	N	N	1								1						1									1												1
2016	11	10.1021/acs.jmedchem.5b01607	5I5W	O=C(Nc1cncnc1)c2ccccc2			5I60*	O=C1N(CCc2ccccc12)c3ccc(cc3)c4cc[nH]n4	GSK, Strathclyde	BCATm	N	N															3	2						1							1	1					1
2016	12	10.1021/acs.jmedchem.6b00927	5K03*	CCn1cc(c(C)n1)c2cc[nH]n2			5K0L	COc1ccc(cc1)C2(CC2)c3cc(n[nH]3)c4sc(C)nc4C	Roche	Catechol O-methyltransferase	N	N	2			1	1										1	1														1
2016	13	10.1038/ncomms12777	3R59	CC(=O)c1cccc(N)c1			4J5C*	CSc1ccccc1C2CCCN2C(=O)C(NC(=O)NCc3ccc(N)cc3)c4ccccc4	Univ Paris Est, Univ Montpellier	Cyclophillin D	N	N	1					1									1	1														1
2016	14	10.1021/acs.jmedchem.6b00007	4G47	Oc1ccc(cc1)n2cnnc2			5IBE	Nc1[nH]nc(c1c2cccc(c2)c3cccc(N)c3)c4ccc(O)cc4	Cambridge, Manchester, Sao Paolo, Crick	CYP121	Y	N															1	1													1
2016	15	10.1021/acsmedchemlett.6b00168	5DTM	CNC(=O)c1cc(c[nH]1)C(=O)c2c(Cl)cccc2Cl			5DTR*	Nc1ncnc2ccc(cc12)N(CC#CC(O)c3nccn3CCO)c4c(Cl)cccc4Cl	Novartis	DOT1L	N	Y															2					2														1	1
2016	16	10.1021/acs.jmedchem.6b00628		Oc1coccc1=O				CN(Cc1cc(=O)c(O)cn1c2ccc(cc2)c3nnn[nH]3)c4ccc(Cl)cc4	Univ Calornia, San Diego	Endonuclease	N	N	2								1		1				2	1			1											1				1
2016	17	10.1021/acsinfecdis.6b00053		OC(=O)C1CCC(CNC(=O)OCc2ccccc2)CC1				Cc1cc(CO)c(C)c(c1)c2ccc(nc2)N3CCC(CC(=O)O)CC3	AZ	FabH	N	N	1									1
2016	18	10.1016/j.bmcl.2016.01.009		Cc1cc(=O)[nH]c2[nH]nc(c3ccccc3)c12			5CTY	O=c1ccc2c(n[nH]c2[nH]1)c3cnc(s3)c4cccnc4	Cubist, Evotec	GyrB	N	N	3			1	2										1	1													1
2016	19	10.1021/acs.jmedchem.5b01527		Cn1nccc1CNc2ccc(O)c(c2)C(=O)O			5A7W	OC(=O)c1ccnc(c1)c2cc(NC(=O)c3ccc(O)cc3)ccc2O	Univ Oxford, Univ California (San Fran)	KDM4C	N	N	2									1	1				2	1						1							1							1
2016	20	10.1021/acs.jmedchem.6b01427	5JAH	CN1C(=O)NC(=O)C1(C)C			5LZ9	CC1(CCS(=O)(=O)CC1)[C@H]2CN(CCOc3ccc(F)c(C#N)c3)C(=O)C2	Astex, GSK	Lp-PLA2	N	N	1								1						2		1					1									1				1
2016	21	10.1021/acs.jmedchem.6b00212	5JAO	Cc1ccc(N)cc1c2ccccc2Cl			5JAU	COC(CO)Cn1ccc(Nc2cc(c(C)cc2OCCN)c3ccccc3C)n1	Astex, GSK	Lp-PLA2	N	N															2	1				1														1			1
2016	22	10.1021/acs.jmedchem.6b00143	5F3T	COc1ccc(CC(=O)O)cc1c2ccccc2			5HMZ*	COc1cccc(c1)S(=O)(=O)NC(=O)c2cc(c3ccc(C#CCO)s3)c(OC)cc2OC	NovartIs, Univ Texas	RdRp	N	N	1									1					3	2								1					1							1	1
2016	23	10.1021/acsmedchemlett.6b00188	5G3M	NC(=O)c1ccc(Cc2ccccc2)cc1			5G3N*	C[C@H](Cc1cccc(c1)c2cc(Cc3ccccc3)ccc2C(=O)N)C(=O)O	AZ	sPLA2	N	N	2							1	1						1	1													1
2016	24	10.1021/acs.jmedchem.5b01865	5F25*	Cn1cc(ccc1=O)c2ccc(cc2)C(=O)N			5F1H	COc1cc(c(OC)cc1CN(C)C)c2cn(C)c(=O)c3cnccc23	Boehringer Ingelheim	BRD9	N	N	1								1						4	4													2								2
2016	25	10.1021/acsmedchemlett.6b00075	4YK0	C[C@@H]1CC(=O)Nc2ccccc2N1			5I8G	C[C@@H]1CC(=O)Nc2cccc(c3ccc4n(C)nc(c5cnn(C)c5)c4c3)c2N1	Constellation, Genentech	CBP/EP300	N	N	2							1	1						1	1													1
2016	26	10.1021/acs.jmedchem.6b00228	5FNQ	OC(=O)CCc1ccc(Cl)cc1			5FNU	COc1cc(cc2nnn(C)c12)[C@@H](CC(=O)O)c3ccc(C)c(CN4C[C@@H](C)Oc5ccccc5S4(=O)=O)c3	Astex, GSK	KEAP1	N	N	1									1					2	1	1													2
2016	27	10.1021/acs.jmedchem.6b00012	4Y03	OC(=O)c1ccccc1O			5DKH	Oc1ccccc1C(=O)/C=C/N2[C@H]3CC[C@@H]2c4ncnc(NC5CC5)c4C3	Pfizer	PB1(5)	N	N	2									1	1				1									1					1
2016	28	10.1039/c5ob02630j	5F1J	O=C(CCC1CCCC1)N2CCCC2	5F27	CNCc1ccc(cc1)N2CCCCC2	5EYR	CCOC(=O)c1ccc(cc1)N2CCC(CNC(=O)N3CCCC3)CC2	Univ Cambridge, Institut Pasteur de Lille	EthR	N	N	1								1						1								1													1
2017	1	10.1021/acs.jmedchem.7b01039		N(c1ccccc1)c2ccnc3ccccc23				Cc1ccc(Oc2ccnc3cc(ccc23)c4cnn(c4)C5CCNCC5)cc1	KAIST, Inha Univ, Univ Ulsan	ALK (L1196M)	N	N	1			1											1	1													1
2017	2	10.1021/acs.jmedchem.7b01344		OC(=O)CCc1nc2cc(Cl)c(Cl)cc2[nH]1			5ISO*	Cc1ccc(Oc2nc3cc(Cl)c(cc3[nH]2)c4ccc(cc4)c5ccccc5)cc1C(=O)O	Merck, Metabasis	AMPK		N	1				1										2	1											1		1								1
2017	3	10.1016/j.bmcl.2017.07.080	5XQX*	CCc1cnccc1c2c[nH]c(C#N)c2			5XS2*	NC(=O)c1[nH]cc(c1C(F)(F)F)c2ccncc2	Roche Innovation Centre Shanghai	CDK8	Y	N	2	1							1						1	1														1
2017	4	10.1021/acs.jmedchem.7b00231	5UIQ	CC(C)Oc1ccccc1C(=O)N			5UIU	CC[C@@H]1[C@H](F)C(=O)N[C@@H]1COc2nccc3cc(C(=O)N)c(OC)cc23	Pfizer	IRAK4	N	N	2							1	1						2	2													2
2017	5	10.1021/acs.jmedchem.7b00947	5WBO	Cc1cc(C)c(C#N)c(n1)N2CCOCC2			5WBZ	C[C@]1(O)CCN(C1)c2nc(cc(c2C#N)C(F)(F)F)N3C[C@H](O)[C@@H](O)C3	Pfizer	Ketohexokinase	Y	N															1	1																		1
2017	6	10.1016/j.bmcl.2017.10.041		Nc1n[nH]c2cccc(I)c12				FC1(F)CC1C(=O)Nc2ccc3[nH]nc(c4nc5cc(ccc5[nH]4)N6CCOCC6)c3c2	Brigham Young Univ, Tolero Pharmaceuticals, Univ Utah	PDK1	N	N	2			1	1										2	2													1					1
2017	7	10.1021/acs.jmedchem.6b01478		CC(=O)c1cc(Cl)c(O)cc1O			5M4P*	C[C@H]1CCc2cc(ccc2N1C(=O)c3ccc(O)cc3O)C(=O)N(C)Cc4ccc5nccnc5c4	Vernalis	Pyruvate Dehydrogenase Kinase	N	N	2										2				1								1													1
2017	8	10.1021/acs.jmedchem.7b00425	5FBI*	NC(=O)c1cc2cc(OCc3ccccc3)ccc2[nH]1			5NB7	NC(=O)c1nn(CC(=O)N2C3CC3C[C@H]2C(=O)Nc4cccc(Br)n4)c5ccccc15	Novartis	Complement factor D	N	Y	2							1	1
2017	9	10.1021/acs.jmedchem.7b01293	5WHC	CN1CCC(CC1)c2noc(n2)c3ccc(O)cc3				CCc1c(cnc(N)c1c2ccc(O)cc2)c3ccc4[nH]ncc4c3	Genentech	USP7		Y	1										1
2017	10	10.1371/journal.pone.0184843	5VBO	Oc1cc(nc2nnnn12)c3ccccc3			5V8N*	OC(=O)[C@@H]1CCCC[C@@H]1NC(=O)c2cnn3c(O)cc(nc23)c4ccccc4	Pfizer, Univ Mass, Univ Hospitals Bonn	cGAS	N	N															1	1													1
2017	11	10.1021/acsmedchemlett.6b00519	5MW3	N[C@@H]1CCCN(C1)c2ncnc3[nH]ccc23			5MW4	CN(CCCNC(=O)CNC(=O)Nc1ccc2sc(Cl)c(c3cccnc3C)c2c1)[C@@H]4CCCN(C4)c5ncnc6[nH]ccc56	Novartis	DOT1L	N	N	2			1	1										2						2														2
2017	12	10.1021/acs.jmedchem.6b01834		CCNC(=O)Nc1cc2ccccc2cn1			5MMO*	CCNC(=O)Nc1cc2c(ccc(CNC(=O)OC)c2cn1)c3ccnc(C)c3	Actelion Pharmaceuticals	GyrB/ParE	N	N	2							2							2	2													1	1
2017	13	10.1021/acsmedchemlett.7b00220		CNc1cnccc1C(=O)O			5VMP	COc1ccc2[C@H](CNc3cnccc3C(=O)O)CCCc2c1	Celgene, European Institute of Oncology, Chicago Univ	KDM4		N	2			1						1					1					1															1
2017	14	10.1021/acs.jmedchem.7b01530	5YE8	CS(=O)(=O)Nc1ccc(F)c(F)c1			5YEA*	Nc1ccc(cc1)S(=O)(=O)Nc2ccc(Oc3ccc(Cl)c(c3)C(F)(F)F)c(C#N)c2	Chinese Academy of Science, ShanghaiTech	Lp-PLA2	N	N	1													1	2					1							1										1
2017	15	10.1021/acs.jmedchem.7b01006		CSc1nc(N)nc2[nH]c(C)nc12			5NGS	Nc1nc(SCCc2ccccc2)c3nc[nH]c3n1	Stockholm Univ, Karolinska Instituet, Uppsala Univ	MTH1		Y	4			2	1	1									1													1
2017	16	10.1021/acs.jmedchem.7b01006		Cc1cc(C)c2oc(N)nc2c1			5NGT*	Cc1cc(c2ccccc2)c3oc(N)nc3c1	Stockholm Univ, Karolinska Instituet, Uppsala Univ	MTH1	N	N	2			1		1									1	1													1
2017	17	10.1016/j.bmcl.2017.10.054	6B98	CNc1nc(Cl)nc2n(C)ncc12			6B96	FC(F)(F)c1ccc(cc1)C2(CC2)Nc3nc(Cl)nc4[nH]ncc34	Merck	PDE2	Y	N															1					1															1
2017	18	10.1021/acs.jmedchem.6b01869		CC(C)c1nc2sc(C(=O)O)c(C)c2c(=O)[nH]1			5T2Y	CNc1nc(CCc2ccccn2)nc3sc(C(=O)O)c(C)c13	MIT, Univ Dundee	PgID acetyltransferase	N	N	2			1						1					2	2														1				1
2017	19	10.1016/j.bmc.2017.05.004	5X1V	Cn1cc(cc1C(=O)N)C(=O)c2cccc(Cl)c2Cl			5X1W	Cn1cc(cc1C(=O)NCCNC(=O)c2cc(cn2C)C(=O)c3cccc(Cl)c3Cl)C(=O)c4cccc(Cl)c4Cl	Daiichi Sankyo	PKM2	N	N	1								1						1						1														1
2017	20	10.1021/acsmedchemlett.7b00191	4A9H	CC1CCc2ccccc2N1C(=O)C			5VOM*	C[C@H]1CN(C(=O)C2CC2)c3cc(ccc3N1C(=O)C)c4ccc(cc4)N5CCS(=O)(=O)CC5	Forma	BRD4	N	N	1								1						2	1				1									1							1
2017	21	10.1016/j.bmcl.2017.02.057	5UEP	CCOC(=O)c1[nH]c(C)c2C(=O)CCCc12			5UER	Cc1[nH]c(c2CCCC(=O)c12)c3cc(NS(=O)(=O)C)ccc3Oc4ccccc4	Abbvie	BRD4	Y	N	1								1						1	1													1
2017	22	10.1021/acs.jmedchem.7b00017	5UF0	CNc1cc(=O)n(C)nc1c2ccccc2			5UEX	CCS(=O)(=O)c1cnc2Oc3ccc(Cl)cc3CCCCOc4cc(=O)n(C)cc4-c2c1	Abbvie	BRD4	N	N	1								1						2	2																					2
2017	23	10.1021/acs.jmedchem.6b01583	5T4U	Cn1c(=O)ccc2ccccc12			5T4V*	Cc1cc2cc(NS(=O)(=O)c3ccc(C#N)cc3)ccc2n(C)c1=O	UCL, SGC< Pfizer, CRUK, AZ etc	BRPF	N	N	1								1						2	2														1				1
2017	24	10.1021/acs.jmedchem.7b01372	6AXQ	COC(=O)c1c[nH]c2ccccc12			6AY3	CNC(=O)c1c[nH]c2ccc(cc12)N3CCCc4cc(c5cnn(C)c5)c(cc34)C(F)F	Genentech, Wuxi, Editas Medicine	CBP/P300	N	N	1								1						2	1							1											1		1
2017	25	10.1021/acs.jmedchem.6b01566	5MKX*	Cn1ncc(NCc2ccc(F)cc2)c(Cl)c1=O			5MLJ	CN1C[C@@H](C[C@@H](C1)c2ccccc2)Nc3cnn(C)c(=O)c3Br	GSK, Cellzome, Univ Strathclyde	PCAF/GCN5	N	N	2					1			1						1					1															1
2017	26	10.1021/acs.jmedchem.7b00313	5X4M	Nc1ncnc(Nc2ccccc2)n1			5X4Q	Clc1cnc(NCc2cccnc2)nc1Nc3ccc4NC(=O)Cc4c3	Takeda	BCL6	N	N	1					1									4	3				1										1				1	1
2017	27	10.1021/acs.jmedchem.7b00359	5N1X	CCNc1cc(nc2ccnn12)c3cccnc3			5N1Z	OC[C@@H]1C[C@H]2CN1c3cc(Nc4cc5CCC(=O)Nc5c(OCC=CCO2)c4)n6ncc(C#N)c6n3	AZ. Pharmaron	BCL6	Y	N	1					1									3	2				1													1	2
2017	28	10.1002/ardp.201600251		Cn1c(cc2ccccc12)C(=O)O				OC(=O)c1cc2ccccc2n1S(=O)(=O)c3ccc(OCc4cccc(Cl)c4)cc3	Dalian University of technology	Mcl-1	N	N	1									1					1				1
2017	29	10.1021/acs.jmedchem.6b01473	5U5K	COc1cccc(CC2CCCNC2)c1			5U62*	CC(C)c1nc(N)n2CC(Cc3cccc4OCOc43)CCc12	Novartis	PRC2/EED	N	N															3	1	1				1									1				1			1
2017	30	10.1021/acs.jmedchem.6b01576	5H24	N#Cc1ccc2nncn2c1NCc3ccco3				C(Nc1ncc(c2ccc(CN3CCCC3)cc2)c4nncn14)c5ccco5	Novartis	PRC2/EED	N	N	3	1		1		1									1	1													1
2018	1	10.1021/acs.jmedchem.8b00782		O=c1[nH]cnc2ccc(cc12)c3cn[nH]c3			6GIN	O=c1n(cnc2ccc(cc12)c3ccnc4ccccc34)c5ccc(cc5)N6CCOCC6	ICR, Univ Barcelona	ALK2	N	N	2	1		1											2	1			1										1					1
2018	2	10.1021/acs.jmedchem.8b00782		O=c1[nH]cnc2ccc(cc12)c3cn[nH]c3			6GIP	Cc1cc2ccc(c(C)c2c(=O)[nH]1)c3ccnc4ccccc34	ICR, Univ Barcelona	ALK2	Y	N	2				1				1						3	3													1	2
2018	3	10.1021/acs.jmedchem.8b01040	3MS9	COC(=O)c1ccc(Cl)cc1N			5MO4	O[C@@H]1CCN(C1)c2ncc(cc2c3ccn[nH]3)C(=O)Nc4ccc(OC(F)(F)Cl)cc4	Novartis	BCR-ABL1	N	Y	1												1
2018	4	10.1016/j.bmcl.2018.09.033	6DI0	NC(=O)c1ccc(NC2CCCCC2)nc1			6DI1*	C[C@H]1CN(C[C@@H](C)O1)c2ccc(Nc3nc(ccc3C(=O)N)N4CC[C@@H](C4)NC(=O)C=C)cc2	EMD Serono	BTK	N	N	2							1	1						2	2																		2
2018	5	10.3390/molecules23020064		Clc1cccc2c(C#N)c[nH]c12				Ic1cccc2c(C#N)c([nH]c12)c3ccccc3	Technische Univ Braunschweig, RWTH Aachen, ManRos Therapeutics	DYRK1A	N	N	1													1	1	1													1
2018	6	10.1021/acs.jmedchem.8b00421	6G92	Cc1c(Nc2ncc(C)cn2)cnn1C			6G9N	C[C@@H](N1Cc2ccc(cc2C1=O)c3nc(NC4CCOCC4)ncc3Cl)C(=O)N[C@H](CO)c5cccc(C)c5	Astex	ERK1/2	N	N	2			1		1									2	1				1									1						1
2018	7	10.1021/acs.jmedchem.7b01795	6CJE*	NC(=O)c1ccc(Nc2ccncn2)cc1			6CK6	Cc1cc(Nc2cc(N)ncn2)c(=O)n3c1C(=O)NC43CCCCC4	eFFector Therapeutics et al	MNK1/2	N	N	1			1											2	1				1														2
2018	8	10.1021/acs.jmedchem.7b01714		OCCNc1ccc2ncc(c3ccc(Cl)cc3)n2n1				CN(C)C1CCN(CC1)C(=O)c2ccc(cc2)c3ccc4ncc(c5ccc(C#N)cc5)n4n3	A*Star et al	MNK1/2	N	N	2	1		1											1	1													1
2018	9	10.1021/acs.jmedchem.8b00060		Brc1ccnc2[nH]ccc12				COc1cc2CCNCc2cc1c3cnn4ccc(cc34)c5ccnc6[nH]ccc56	A*STAR	PKC iota	N	N	2			1	1										1												1		1
2018	10	10.1021/acsmedchemlett.7b00512		O=c1[nH]cnc2sccc12			5N9R*	C[C@H](CC(=O)N1CCC(O)(Cn2cnc3c(c4ccc(CN)cc4)n(C)nc3c2=O)CC1)c5ccccc5	Almac, Queen's Univ Belfast	USP7		N	3	1		1					1						3	1			2										1						2
2018	11	10.1038/s41557-018-0039-2	5O4V	CN(C)Cc1n[nH]c2ccc(cc12)c3ccc(F)cc3C			5MU6	CN(C)Cc1nn(C)c2ccc(cc12)c3ccc(F)c(F)c3OCCc4c(C)nn(C)c4C	Imperial	Human N-myristoyltransferase	N	N	1						1								3	2			1																1		1
2018	12	10.1021/acs.jmedchem.7b01622	5OU2	Brc1ccc(cc1)c2c[nH]cn2			5OU3	C[C@H](Oc1ccc(cc1)c2cn(C)cn2)C(=O)Nc3nc(c[nH]3)c4ccc(Br)cc4	Univ Cambridge, Univ Cape Town, Univ Melbourne	IMPDH	N	N	1				1										2	1											1							1			1
2018	13	10.1021/acs.jmedchem.7b01884	6F20	CCOC(=O)c1ccnc2[nH]ccc12			6F1X*	CCNC(=O)c1cc2c(ccnc2[nH]1)N3CCOC[C@@H]3C	Sprint Bioscience et al	MTH1	N	N	2			1	1										2	2													1					1
2018	14	10.1016/j.bmcl.2017.12.023		O=C(Cc1ccccc1)Nc2ccc3nc[nH]c3c2				CC(C)CCNC(=O)c1ccc(NC(=O)Nc2ccc3nc[nH]c3c2)cc1	Abbvie	NAMPT	N	N															1								1													1
2018	15	10.1248/cpb.c17-00836	5XUJ	Cc1cc2nccc(c3ccc(Cl)cc3)n2n1			5XUI*	Cc1cc(C)n2nc(CCc3cc(O)n4nc5ccccc5c4n3)nc2n1	Astellas	PDE10A	N	N	1			1											4	4													2	1							1
2018	16	10.1021/acs.jmedchem.7b01691	6CCM*	Cc1[nH]c2nc(NCc3ccccc3F)nn2c(=O)c1C			6CCK	Cc1cc(=O)n2nc(N[C@H](CC#N)c3cccc(Cl)c3)nc2[nH]1	Novartis	PPAT	N	N	2			1		1									2	1	1														1
2018	17	10.1021/acs.jmedchem.7b01666	4A9H	CC1CCc2ccccc2N1C(=O)C			6FFG	CC(=O)N1[C@H](CN(Cc2ccccc2CO)c3cc(ccc13)C4=CCNCC4)C5CC5	GSK, Strathclyde	BET family BD2	N	N	1								1						3	1	1			1									1		1				1
2018	18	10.1016/j.bmcl.2018.04.016		CC(=O)c1cn(C)c(=O)c2ccccc12			6CKS	CCOc1ccc(cc1c2cn(C)c(=O)c3ccc(cc23)c4cnn(C)c4)S(=O)(=O)CC	Celgene Quanticel Research, Univ Chicago	BRD4-BD1	N	N	1								1						2	2													2
2018	19	10.1021/acscentsci.7b00401	4TQN*	CCOc1ccc(cc1N)C(=O)C			5NLK	CCOc1ccc(cc1NC(=O)c2cc(NC(=O)C)cc(NC(=O)c3ccco3)c2)C(=O)C	Univ Zurich	CBP	Y	N	1								1						1					1																1
2018	20	10.1016/j.ejmech.2018.01.087	5XXH*	CC(=O)c1cn(CCC(=O)O)c2ccccc12				COc1ccc2n(cc(C(=O)Nc3cc(cc(c4cnn(C)c4)c3F)C(=O)O)c2c1)C(=O)C	Chinese Academy of Sciences	CBP/EP300	N	N	2								1	1					2	2													1								1
2018	21	10.1038/s41467-018-05707-2	5OCO*	O=C(Nc1ccc2ccccc2n1)c3ccco3			6FA4	COc1nc(ccc1Nc2ccc(CN(C)C)cc2)c3cccc4OCCOc34	Univ Oxford, Univ Leeds et al	HRAS	N	Y															1	1													1
2018	22	10.1021/acs.jmedchem.8b00375	6D9X	C1Cc2nc(cn2C1)c3ccccc3			6DAS*	COc1cc(cc(OC)c1C)C(=O)N[C@@H]2CCc3ccc(cc23)c4cn5CCCc5n4	Vanderbilt	WDR5	N	N	1			1											2	2														2
2018	23	10.1002/anie.201712581		NCc1ccc(cc1)c2ncccn2				Clc1ccc(CNCc2ccc(cc2)c3ncccn3)cc1Cl	Vrije Univ et al	?2AR		N	1						1								1						1														1
2018	24	10.1021/acs.jmedchem.8b00250	4N07	O=S1(=O)NCN(C2CC2)c3ccccc31			6FAZ	O=S1(=O)NCN(C2CC2)c3cc(CCc4ccc5c(c4)N(CNS5(=O)=O)C6CC6)ccc31	Univ Copenhagen et al	AMPA receptor	N	N	1													1	1	1														1
2018	25	10.1021/acs.jmedchem.8b00529	6FZU	CCOc1ccc(NC(=O)C)cc1Cl			6G07	CCS(=O)(=O)c1ccc(CC(=O)Nc2cnc(O[C@@H](C)c3ccccc3)c(Cl)c2)cc1	Novartis	RORyT	N	N	2							1	1						2					1					1											1
2018	26	10.1016/j.bmcl.2018.10.032		OB1OCc2ccc(cc12)C(=O)O				OB1OCc2ccc(Cc3nnn[nH]3)cc12	GSK, Cellzome	Unknown		N															1	1														1
2019	1	10.1021/acsmedchemlett.8b00546		Nc1ncccc1C(=O)Nc2ccccc2			6ILZ	Nc1ncc(cc1C(=O)Nc2ccncc2)c3cccc(c3)N4CCNCC4	A*STAR	PKC-i	N	N	2			1		1									1	1													1
2019	2	10.1021/acsmedchemlett.9b00141	6SZE	NC(=O)c1cnn(c1N)c2ccccc2			6UL8	NC(=O)c1c(nn2C[C@H]3C[C@H](O)[C@H](C3)Nc12)c4ccc5scnc5c4	GSK	RIP2	Y	N	2					1			1						2	1			1															1	1
2019	3	10.1016/j.bmcl.2019.126675		NC(=N)c1ccccc1			6SKB*	NC(=N)c1ccc(cc1OCc2cccnc2)[C@H]3Cc4ccc(cc4B(O)O3)C(F)(F)F	GSK, INSERM	Kallikrein 5 (KLK5)	N	N	1													1	2	2														1							1
2019	4	10.1021/acs.jmedchem.9b00662	2D0T	c1ncc([nH]1)c2ccccc2			6O3I	O[C@H](C[C@H]1c2c(cccc2F)-c3cncn13)[C@H]4CC[C@H](O)CC4	NewLink Genetics, Genentech	IDO1	N	N	1			1											3	2			1											1					1
2019	5	10.1002/cmdc.201900084	4MK1	Oc1cc(Br)c[nH]c1=O			6NEL	OC(=O)c1ccc(cc1)c2cc(O)c(=O)[nH]c2c3ccc(F)cc3	State Univ New Jersey, Univ Rochester Medical Center	Influenza A endonuclease	N	N	3				1				1		1				2	1											1		2
2019	6	10.1016/j.bmcl.2019.02.008	2XFP	O=C1Nc2ccccc2C1=O				Clc1ccc(COc2ccc3NC(=O)C(=O)c3c2)cc1Cl	Hefei Univ Technology	hMAO-B		N	2							1	1						1	1																					1
2019	7	10.1016/j.ejmech.2019.04.037	6EQ5	Nc1nc2cc(Cl)ccc2n1CCCO			6EQ7	Nc1nc2c(ccnc2[nH]1)c3ccncc3F	Univ Zurich, Univ Applied Sciences and Arts Northwestern Switzerland	MTH1	Y	N	2			1		1									1	1													1
2019	8	10.1039/C9MD00096H	6R8P	Cc1ccccc1OCC(=O)Nc2cccnc2			6R8Q*	CC(C)n1cc2ccc(NC(=O)COc3ccccc3C)cc2n1	Univ College, London; Univ Oxford; The Francis Crick Institute	Notum	N	N															2	2													1					1
2019	9	10.1038/s41589-019-0310-x	6G25	Cc1noc(C)c1c2[nH]ncc2c3ccncc3			6G2O	Cc1cc(CN)cc(C)c1c2ncn(C)c2c3ccnc4cc(F)ccc34	Boehringer Ingelheim, Univ Toronto, Univ Oxford, Univ North Carolina, Cold Spring Harbor	NSD3-PWWP1	N	N	2	1		1											4	3			1										3					1
2019	10	10.1021/acs.jmedchem.9b00747	6E6V	Cc1cc(=O)c(O)c([nH]1)C(=O)O			6E6W*	OC(=O)c1[nH]c(cc(=O)c1O)c2ccc(cc2C(F)(F)F)c3nnn[nH]3	UCSD, Nankai Univ	PAN Endonuclease (Influenza virus)	N	N	3								1	1	1				1	1													1
2019	11	10.1021/acs.jmedchem.9b00718	6RIH	Cn1nc(cc1C(=O)NC2CC2)c3ccccc3			6RJ6	Cc1cc2n(C)c(cc2c(Cl)c1Cl)C(=O)N[C@H](CO)c3ccc(cc3)S(=O)(=O)CC(=O)O	Boehringer Ingelheim, Shanghai ChemPartner	PHGDH	N	N	1							1							1								1													1
2019	12	10.1021/acs.jmedchem.9b00809	6QOT	COc1ccc(cc1)c2cc(N)n[nH]2	6QOU	B(c1ccc2cc[nH]c2c1)(O)O	6QR6	Nc1n[nH]c(c1C#N)c2ccc3ccn(Cc4ccc(CN5CCCC5)cc4)c3c2	Univ Cambridge, Royal Papworth Hospital, National Institutes of Health	Mab TrmD	N	N	2			1	1										3	3													1				1	1
2019	13	10.1016/j.bmcl.2019.126717	6R9S	O[C@@H]1CO[C@@H]2C[C@@H]1Nc3ccc(F)cc23	6RA1	C1C[C@H]2C[C@@H]1[C@@H]3[C@H]2C(=O)N(C3=O)CC(=O)O	6R8W*	O[C@@H]1CO[C@H]2C[C@H]1Nc3ccc(CNC(=O)CN4C(=O)[C@H]5[C@H]6CC[C@H](C6)[C@H]5C4=O)cc23	Merck KGaA, EMD Serono, Edelris, Proteros Biostructures	Cyclophilin D	N	N	2								1			1			2									1			1			1						1
2019	14	10.1073/pnas.1904529116	4EPV	C(c1c[nH]c2ccccc12)c3nc4ccncc4[nH]3			6GJ7*	Cn1cnc(Cn2ccc3ccc(CNCc4[nH]c5ccccc5c4[C@H]6NC(=O)c7ccc(O)cc67)cc23)c1	Boehringer Ingelheim, Vanderbilt Univ	K-RasG12D	N	N	1				1										2	2														2
2019	15	10.1021/acsmedchemlett.9b00309		Nc1ccc2cc(ccc2n1)N3CCOCC3				CC(=O)O[Rh](OC(=O)C)[Rh](OC(=O)C)OC(=O)CCCN1CCN(CC1)c2ccc3nc(N)ccc3c2	Rice Univ	Lyn SH3	N	N	2			1		1									1						1														1
2019	16	10.1021/acs.jmedchem.9b00134		CCc1sc2ncnc(N[C@@H](C)C(=O)O)c2c1CC			6QYO	CCc1sc2ncnc(O[C@H](Cc3ccccc3)C(=O)O)c2c1c4ccc(OCCN5CCN(C)CC5)c(Cl)c4C	Servier, Vernalis	Mcl-1	N	N	1									1					2	1	1												1	1
2019	17	10.1016/j.ejmech.2018.12.018	5YAV	CC(C)Sc1nnnn1c2ccccc2			5YAW*	COc1ccc(CSc2nnc(c3ccc(OCC(=O)Nc4cccnc4)cc3)n2Cc5ccccc5)cc1	Shanghai Institute of Materia Medica	PDE?	N	N	2			2											3	2												1	1						1		1
2019	18	10.1038/s41467-019-13616-1	600Y	Cc1ccc(C)c(Cn2c(CO)nc3ccccc23)c1			6OP0	Cc1ccc(C)c(Cn2c(nc3ccc(cc23)c4cnn(C)c4)C(O)c5ccncc5)c1	UCB, Covance, Broad Institute	TNF	N	N	2			1								1			2	1	1												1	1
2019	19	10.1021/acs.jmedchem.8b00161		C(c1ccccc1)n2nnc3ccccc23				Brc1cccc2n(CC3CCCCC3)nnc12	Gedeon Richter Plc., Hungarian Academy of Sciences, Mitsubishi Tanabe	mGluR2		N															2	1			1																1
2019	20	10.1021/acs.jmedchem.9b00178	6NCN	NC(=N)C1(CCC1)c2cccc(Cl)c2			6NCO*	CN(C)CCNC(=O)c1ccc(cc1)c2cc(Cl)cc(c2)C3(CCC3)C(=N)N	AbbVie	Apolipoprotein E4	N	N	1													1	1	1													1
[truncated: 3 more columns]
